# Supplementary material for: Sub-megabase resolution tiling (SMRT) array-based comparative genomic hybridization profiling reveals novel gains and losses of chromosomal regions in Hodgkin Lymphoma and Anaplastic Large Cell Lymphoma cell lines
Source: PubMed Central journal article supplement (PMC2254646; doi:10.1186/1476-4598-7-2), 2008-01-07
Supplement: 1476-4598-7-2-S1.pdf [file 1476-4598-7-2-S1.pdf]

**Additional file 1:** Functional profiling of the genes reported to be differentially expressed in HL and ALCL cell lines

---

| <b>Gene ID</b> | <b>Gene Name</b> |
|----------------|------------------|
|----------------|------------------|

---

**Zinc ion binding (10)**

|        |                                                                       |
|--------|-----------------------------------------------------------------------|
| ZCCHC2 | zinc finger, CCHC domain containing 2                                 |
| ZNF516 | zinc finger protein 516                                               |
| DNAJA1 | DnaJ (Hsp40) homolog, subfamily A, member 1                           |
| UHRF2  | ubiquitin-like, containing PHD and RING finger domains, 2             |
| DTX3   | deltex 3 homolog (Drosophila)                                         |
| RASA3  | RAS p21 protein activator 3                                           |
| ZFP64  | zinc finger protein 64 homolog (mouse)                                |
| DCT    | dopachrome tautomerase (dopachrome delta-isomerase, tyrosine-related) |
| GTF3A  | General transcription factor IIIA                                     |
| ING3   | inhibitor of growth family, member 3                                  |

**Transferase activity (13)**

|           |                                                                      |
|-----------|----------------------------------------------------------------------|
| AK3L1     | adenylate kinase 3-like 1                                            |
| TPST1     | tyrosylprotein sulfotransferase 1                                    |
| MTR       | 5-methyltetrahydrofolate-homocysteine methyltransferase              |
| TBK1      | TANK-binding kinase 1                                                |
| JAK2      | Janus kinase 2 (a protein tyrosine kinase)                           |
| ATM       | ataxia telangiectasia mutated (includes complementation groups A, C) |
| STK24     | serine/threonine kinase 24 (STE20 homolog, yeast)                    |
| NEK7      | NIMA (never in mitosis gene a)-related kinase 7                      |
| CDK6      | cyclin-dependent kinase 6                                            |
| PNPT1     | polyribonucleotide nucleotidyltransferase 1                          |
| TLK1      | tousled-like kinase 1                                                |
| LOC196541 | Hypothetical protein LOC196541                                       |
| PAN3      | PAN3 polyA specific ribonuclease subunit homolog (S. cerevisiae)     |

**Transcription factor activity (9)**

|        |                                                                               |
|--------|-------------------------------------------------------------------------------|
| NFE2L2 | nuclear factor (erythroid-derived 2)-like 2                                   |
| DDIT3  | DNA-damage-inducible transcript 3                                             |
| MYOG   | myogenin (myogenic factor 4)                                                  |
| STAT1  | signal transducer and activator of transcription 1, 91kDa                     |
| MYC    | v-myc myelocytomatosis viral oncogene homolog (avian)                         |
| REL    | v-rel reticuloendotheliosis viral oncogene homolog (avian)                    |
| TFAP2C | transcription factor AP-2 gamma (activating enhancer binding protein 2 gamma) |
| HOXC5  | homeobox C5                                                                   |
| HOXC4  | homeobox C4                                                                   |

## Additional file 1 (continued)

| Gene ID                                             | Gene Name                                                           |
|-----------------------------------------------------|---------------------------------------------------------------------|
| <b>Signal transducer activity (7)</b>               |                                                                     |
| STAT1                                               | signal transducer and activator of transcription 1, 91kDa           |
| GNAS                                                | GNAS complex locus                                                  |
| REL                                                 | v-rel reticuloendotheliosis viral oncogene homolog (avian)          |
| TBK1                                                | TANK-binding kinase 1                                               |
| GNG4                                                | guanine nucleotide binding protein (G protein), gamma 4             |
| RGS1                                                | regulator of G-protein signalling 1                                 |
| RGS2                                                | regulator of G-protein signalling 2, 24kDa                          |
| <b>Protein serine/threonine kinase activity (6)</b> |                                                                     |
| ATM                                                 | ataxia telangiectasia mutated (includes complementation groups A, C |
| CDK6                                                | cyclin-dependent kinase 6                                           |
| NEK7                                                | NIMA (never in mitosis gene a)-related kinase 7                     |
| TLK1                                                | tousled-like kinase 1                                               |
| TBK1                                                | TANK-binding kinase 1                                               |
| STK24                                               | serine/threonine kinase 24 (STE20 homolog, yeast)                   |
| <b>Protein binding (27)</b>                         |                                                                     |
| PARD6G                                              | par-6 partitioning defective 6 homolog gamma (C. elegans)           |
| CTNND2                                              | catenin (cadherin-associated protein), delta 2 (neural              |
| UHRF2                                               | ubiquitin-like, containing PHD and RING finger domains, 2           |
| XPO1                                                | exportin 1 (CRM1 homolog, yeast)                                    |
| NARG1L                                              | NMDA receptor regulated 1-like                                      |
| RHOBTB3                                             | Rho-related BTB domain containing 3                                 |
| DTX3                                                | deltex 3 homolog (Drosophila)                                       |
| ING3                                                | inhibitor of growth family, member 3                                |
| SNAP25                                              | synaptosomal-associated protein, 25kDa                              |
| RCBTB1                                              | regulator of chromosome condensation (RCC1) and BTB (POZ) domain    |
| PCNA                                                | proliferating cell nuclear antigen                                  |
| CDK6                                                | cyclin-dependent kinase 6                                           |
| TNFAIP6                                             | tumor necrosis factor, alpha-induced protein 6                      |
| TH1L                                                | TH1-like (Drosophila)                                               |
| VPS4B                                               | vacuolar protein sorting 4 homolog B (S. cerevisiae)                |
| ITGB6                                               | integrin, beta 6                                                    |
| KBTBD6                                              | kelch repeat and BTB (POZ) domain containing 6                      |
| HSPB1                                               | heat shock 27kDa protein 1                                          |
| FKBP1A                                              | FK506 binding protein 1A, 12kDa                                     |
| BRCA2                                               | breast cancer 2, early onset                                        |
| CDH4                                                | cadherin 4, type 1, R-cadherin (retinal)                            |
| RAD21                                               | RAD21 homolog (S. pombe)                                            |
| PRSS3                                               | protease, serine, 3 (mesotrypsin)                                   |
| STAT1                                               | signal transducer and activator of transcription 1, 91kDa           |
| MYC                                                 | v-myc myelocytomatosis viral oncogene homolog (avian)               |
| ATM                                                 | ataxia telangiectasia mutated (includes complementation groups A, C |
| ATP5E                                               | ATP synthase, H+ transporting, mitochondrial F1 complex, epsilon    |

## Additional file 1 (continued)

| Gene ID                        | Gene Name                                                                    |
|--------------------------------|------------------------------------------------------------------------------|
| <b>Nucleotide binding (17)</b> |                                                                              |
| AK3L1                          | adenylate kinase 3-like 1                                                    |
| DNAH5                          | dynein, axonemal, heavy polypeptide 5                                        |
| GNAS                           | GNAS complex locus                                                           |
| LEMD3                          | LEM domain containing 3                                                      |
| TBK1                           | TANK-binding kinase 1                                                        |
| JAK2                           | Janus kinase 2 (a protein tyrosine kinase)                                   |
| MSH6                           | mutS homolog 6 (E. coli)                                                     |
| STK24                          | serine/threonine kinase 24 (STE20 homolog, yeast)                            |
| NEK7                           | NIMA (never in mitosis gene a)-related kinase 7                              |
| CDK6                           | cyclin-dependent kinase 6                                                    |
| TLK1                           | tousled-like kinase 1                                                        |
| MYO10                          | myosin X                                                                     |
| DDX4                           | DEAD (Asp-Glu-Ala-Asp) box polypeptide 4                                     |
| DDX6                           | DEAD (Asp-Glu-Ala-Asp) box polypeptide 6                                     |
| RBMS1                          | RNA binding motif, single stranded interacting protein 1                     |
| VPS4B                          | Vacuolar protein sorting 4 homolog B (S. cerevisiae)                         |
| PAN3                           | PAN3 polyA specific ribonuclease subunit homolog (S. cerevisiae)             |
| <b>Metal ion binding (12)</b>  |                                                                              |
| ZCCHC2                         | zinc finger, CCHC domain containing 2                                        |
| ZNF516                         | zinc finger protein 516                                                      |
| MTR                            | 5-methyltetrahydrofolate-homocysteine methyltransferase                      |
| DNAJA1                         | DnaJ (Hsp40) homolog, subfamily A, member 1                                  |
| UHRF2                          | ubiquitin-like, containing PHD and RING finger domains, 2                    |
| ATP5E                          | ATP synthase, H <sup>+</sup> transporting, mitochondrial F1 complex, epsilon |
| DTX3                           | deltex 3 homolog (Drosophila)                                                |
| RASA3                          | RAS p21 protein activator 3                                                  |
| ZFP64                          | zinc finger protein 64 homolog (mouse)                                       |
| DCT                            | dopachrome tautomerase (dopachrome delta-isomerase, tyrosine-related)        |
| GTF3A                          | General transcription factor IIIA                                            |
| ING3                           | inhibitor of growth family, member 3                                         |
| <b>Hydrolase activity (8)</b>  |                                                                              |
| DDX4                           | DEAD (Asp-Glu-Ala-Asp) box polypeptide 4                                     |
| ATP5E                          | ATP synthase, H <sup>+</sup> transporting, mitochondrial F1 complex, epsilon |
| NUDT15                         | nudix (nucleoside diphosphate linked moiety X)-type motif 15                 |
| DDX6                           | DEAD (Asp-Glu-Ala-Asp) box polypeptide 6                                     |
| EYA2                           | eyes absent homolog 2 (Drosophila)                                           |
| PIGN                           | phosphatidylinositol glycan, class N                                         |
| PRSS1                          | protease, serine, 1 (trypsin 1)                                              |
| ACOT12                         | Acyl-CoA thioesterase 12                                                     |
| <b>DNA binding (8)</b>         |                                                                              |
| ATM                            | ataxia telangiectasia mutated (includes complementation groups A, C)         |
| RBMS1                          | RNA binding motif, single stranded interacting protein 1                     |
| ZFP64                          | zinc finger protein 64 homolog (mouse)                                       |

## Additional file 1 (continued)

| Gene ID                         | Gene Name                                                           |
|---------------------------------|---------------------------------------------------------------------|
| PCNA                            | proliferating cell nuclear antigen                                  |
| UHRF2                           | ubiquitin-like, containing PHD and RING finger domains, 2           |
| MTERF                           | mitochondrial transcription termination factor                      |
| GTF3A                           | General transcription factor IIIA                                   |
| ZNF516                          | zinc finger protein 516                                             |
| <b>Calcium ion binding (8)</b>  |                                                                     |
| STAT1                           | signal transducer and activator of transcription 1, 91kDa           |
| GCA                             | grancalcin, EF-hand calcium binding protein                         |
| PRSS3                           | protease, serine, 3 (mesotrypsin)                                   |
| SLC25A12                        | solute carrier family 25 (mitochondrial carrier, Aralar), member 12 |
| HGF                             | hepatocyte growth factor (hepapoietin A; scatter factor)            |
| PRSS2                           | protease, serine, 2 (trypsin 2)                                     |
| CDH4                            | cadherin 4, type 1, R-cadherin (retinal)                            |
| PRSS1                           | protease, serine, 1 (trypsin 1)                                     |
| <b>ATP binding (15)</b>         |                                                                     |
| AK3L1                           | adenylate kinase 3-like 1                                           |
| DNAH5                           | dynein, axonemal, heavy polypeptide 5                               |
| TBK1                            | TANK-binding kinase 1                                               |
| JAK2                            | Janus kinase 2 (a protein tyrosine kinase)                          |
| MSH6                            | mutS homolog 6 (E. coli)                                            |
| STK24                           | serine/threonine kinase 24 (STE20 homolog, yeast)                   |
| NEK7                            | NIMA (never in mitosis gene a)-related kinase 7                     |
| CDK6                            | cyclin-dependent kinase 6                                           |
| TLK1                            | tousled-like kinase 1                                               |
| MYO10                           | myosin X                                                            |
| DDX4                            | DEAD (Asp-Glu-Ala-Asp) box polypeptide 4                            |
| VPS4B                           | vacuolar protein sorting 4 homolog B (S. cerevisiae)                |
| PAN3                            | PAN3 polyA specific ribonuclease subunit homolog (S. cerevisiae)    |
| DDX6                            | DEAD (Asp-Glu-Ala-Asp) box polypeptide 6                            |
| ACOT12                          | Acyl-CoA thioesterase 12                                            |
| <b>Binding (5)</b>              |                                                                     |
| RTTN                            | rotatin                                                             |
| KIAA0372                        | Hypothetical protein KIAA0372                                       |
| RANBP6                          | RAN binding protein 6                                               |
| SLC25A12                        | solute carrier family 25 (mitochondrial carrier, Aralar), member 12 |
| APRIN                           | androgen-induced proliferation inhibitor                            |
| <b>Nucleic acid binding (5)</b> |                                                                     |
| ZCCHC2                          | zinc finger, CCHC domain containing 2                               |
| DDX4                            | DEAD (Asp-Glu-Ala-Asp) box polypeptide 4                            |
| ZFP64                           | zinc finger protein 64 homolog (mouse)                              |
| DDX6                            | DEAD (Asp-Glu-Ala-Asp) box polypeptide 6                            |
| BRCA2                           | breast cancer 2, early onset                                        |

## Additional file 1 (continued)

| Gene ID                                       | Gene Name                                                                                   |
|-----------------------------------------------|---------------------------------------------------------------------------------------------|
| <b>Peptidase activity (5)</b>                 |                                                                                             |
| USP15                                         | ubiquitin specific peptidase 15                                                             |
| PRSS3                                         | protease, serine, 3 (mesotrypsin)                                                           |
| CTSE                                          | cathepsin E                                                                                 |
| PRSS2                                         | protease, serine, 2 (trypsin 2)                                                             |
| PRSS1                                         | protease, serine, 1 (trypsin 1)                                                             |
| <b>RNA binding (5)</b>                        |                                                                                             |
| RBMS1                                         | RNA binding motif, single stranded interacting protein 1                                    |
| DDX6                                          | DEAD (Asp-Glu-Ala-Asp) box polypeptide 6                                                    |
| PNPT1                                         | polyribonucleotide nucleotidyltransferase 1                                                 |
| XPO1                                          | exportin 1 (CRM1 homolog, yeast)                                                            |
| GTF3A                                         | General transcription factor IIIA                                                           |
| <b>Unfolding protein binding (4)</b>          |                                                                                             |
| TBCE                                          | tubulin-specific chaperone e                                                                |
| TBCA                                          | tubulin-specific chaperone a                                                                |
| CRYAB                                         | crystallin, alpha B                                                                         |
| DNAJA1                                        | DnaJ (Hsp40) homolog, subfamily A, member 1                                                 |
| <b>Receptor Activity (4)</b>                  |                                                                                             |
| ITGB6                                         | integrin, beta 6                                                                            |
| LY75                                          | lymphocyte antigen 75                                                                       |
| FKBP1A                                        | FK506 binding protein 1A, 12kDa                                                             |
| OPN3                                          | opsin 3 (encephalopsin, panopsin)                                                           |
| <b>Sequence-specific DNA binding (4)</b>      |                                                                                             |
| DDIT3                                         | DNA-damage-inducible transcript 3                                                           |
| HOXC5                                         | homeobox C5                                                                                 |
| HOXC4                                         | homeobox C4                                                                                 |
| NFE2L2                                        | nuclear factor (erythroid-derived 2)-like 2                                                 |
| <b>Structural constituent of ribosome (4)</b> |                                                                                             |
| RPS27A                                        | ribosomal protein S27a                                                                      |
| KIAA0372                                      | Hypothetical protein KIAA0372                                                               |
| RPS23                                         | ribosomal protein S23                                                                       |
| RPS6                                          | ribosomal protein S6                                                                        |
| <b>Transporter activity (4)</b>               |                                                                                             |
| SLC2A10                                       | solute carrier family 2 (facilitated glucose transporter), member 10                        |
| TM9SF2                                        | transmembrane 9 superfamily member 2                                                        |
| SLC25A12                                      | solute carrier family 25 (mitochondrial carrier, Aralar), member 12                         |
| ATP5G3                                        | ATP synthase, H <sup>+</sup> transporting, mitochondrial F <sub>0</sub> complex, subunit C3 |

## Additional file 1 (continued)

| Gene ID                                     | Gene Name                                                    |
|---------------------------------------------|--------------------------------------------------------------|
| <b>Trypsin activity (3)</b>                 |                                                              |
| PRSS1                                       | protease, serine, 1 (trypsin 1)                              |
| PRSS2                                       | protease, serine, 2 (trypsin 2)                              |
| PRSS3                                       | protease, serine, 3 (mesotrypsin)                            |
| <b>Protein-tyrosine kinase activity (3)</b> |                                                              |
| JAK2                                        | Janus kinase 2 (a protein tyrosine kinase)                   |
| NEK7                                        | NIMA (never in mitosis gene a)-related kinase 7              |
| STK24                                       | serine/threonine kinase 24 (STE20 homolog, yeast)            |
| <b>Magnesium ion binding (3)</b>            |                                                              |
| NEK7                                        | NIMA (never in mitosis gene a)-related kinase 7              |
| NUDT15                                      | nudix (nucleoside diphosphate linked moiety X)-type motif 15 |
| EYA2                                        | eyes absent homolog 2 (Drosophila)                           |
| <b>GTPase activator activity (3)</b>        |                                                              |
| RASA3                                       | RAS p21 protein activator 3                                  |
| RGS1                                        | regulator of G-protein signalling 1                          |
| RGS2                                        | regulator of G-protein signalling 2, 24kDa                   |
| <b>ATP-dependent helicase activity (3)</b>  |                                                              |
| DDX4                                        | DEAD (Asp-Glu-Ala-Asp) box polypeptide 4                     |
| DDX6                                        | DEAD (Asp-Glu-Ala-Asp) box polypeptide 6                     |
| INTS6                                       | integrator complex subunit 6                                 |
| <b>Calmodulin binding (2)</b>               |                                                              |
| RGS1                                        | regulator of G-protein signalling 1                          |
| RGS2                                        | regulator of G-protein signalling 2, 24kDa                   |
| <b>Chaperone binding (2)</b>                |                                                              |
| TBCE                                        | tubulin-specific chaperone e                                 |
| TBCA                                        | tubulin-specific chaperone a                                 |
| <b>Double-stranded DNA binding (2)</b>      |                                                              |
| RBMS1                                       | RNA binding motif, single stranded interacting protein 1     |
| MTERF                                       | mitochondrial transcription termination factor               |
| <b>GTP binding (3)</b>                      |                                                              |
| AK3L1                                       | adenylate kinase 3-like 1                                    |
| GNAS                                        | GNAS complex locus                                           |
| ARL15                                       | ADP-ribosylation factor-like 15                              |
| <b>GTPase activity (2)</b>                  |                                                              |
| GNAS                                        | GNAS complex locus                                           |
| RHOBTB3                                     | Rho-related BTB domain containing 3                          |

## Additional file 1 (continued)

| Gene ID                                                                          | Gene Name                                                            |
|----------------------------------------------------------------------------------|----------------------------------------------------------------------|
| <b>Hydrogen-transporting ATP/ase synthase activity, rotational mechanism (2)</b> |                                                                      |
| ATP5E                                                                            | ATP synthase, H+ transporting, mitochondrial F1 complex, epsilon     |
| ATP5G3                                                                           | ATP synthase, H+ transporting, mitochondrial F0 complex, subunit C3  |
| <b>Identical protein binding (2)</b>                                             |                                                                      |
| BCL2                                                                             | B-cell CLL/lymphoma 2                                                |
| CLDN4                                                                            | Claudin 4                                                            |
| <b>Isomerase activity (2)</b>                                                    |                                                                      |
| DCT                                                                              | dopachrome tautomerase (dopachrome delta-isomerase, tyrosine-related |
| FKBP1A                                                                           | FK506 binding protein 1A, 12kDa                                      |
| <b>Kinase activity (2)</b>                                                       |                                                                      |
| AK3L1                                                                            | adenylate kinase 3-like 1                                            |
| STK24                                                                            | serine/threonine kinase 24 (STE20 homolog, yeast)                    |
| <b>Protein dimerization activity (2)</b>                                         |                                                                      |
| DDIT3                                                                            | DNA-damage-inducible transcript 3                                    |
| NFE2L2                                                                           | nuclear factor (erythroid-derived 2)-like 2                          |
| <b>Receptor binding (2)</b>                                                      |                                                                      |
| JAK2                                                                             | Janus kinase 2 (a protein tyrosine kinase)                           |
| ANGPTL1                                                                          | angiopoietin-like 1                                                  |
| <b>Serine-type endopeptidase activity (2)</b>                                    |                                                                      |
| PRSS3                                                                            | protease, serine, 3 (mesotrypsin)                                    |
| HGF                                                                              | hepatocyte growth factor (hepapoietin A; scatter factor)             |
| <b>Single-stranded DNA binding (2)</b>                                           |                                                                      |
| RBMS1                                                                            | RNA binding motif, single stranded interacting protein 1             |
| BRCA2                                                                            | breast cancer 2, early onset                                         |
| <b>Structural molecule activity (2)</b>                                          |                                                                      |
| CTNND2                                                                           | catenin (cadherin-associated protein), delta 2 (neural               |
| CLDN4                                                                            | Claudin 4                                                            |
| <b>Sugar binding (2)</b>                                                         |                                                                      |
| LY75                                                                             | lymphocyte antigen 75                                                |
| LGALS8                                                                           | lectin, galactoside-binding, soluble, 8 (galectin 8)                 |
| <b>3'-5'-exoribonuclease activity</b>                                            |                                                                      |
| PNPT1                                                                            | polyribonucleotide nucleotidyltransferase 1                          |
| <b>Acetyltransferase activity</b>                                                |                                                                      |
| NARG1L                                                                           | NMDA receptor regulated 1-like                                       |

## Additional file 1 (continued)

| Gene ID                                            | Gene Name                                                             |
|----------------------------------------------------|-----------------------------------------------------------------------|
| <b>Actin binding</b>                               |                                                                       |
| MYO10                                              | myosin X                                                              |
| <b>Adenylate kinase activity</b>                   |                                                                       |
| AK3L1                                              | adenylate kinase 3-like 1                                             |
| <b>Aminopeptidase activity</b>                     |                                                                       |
| DPP4                                               | dipeptidyl-peptidase 4 (CD26, adenosine deaminase complexing protein) |
| <b>ATPase activity</b>                             |                                                                       |
| DNAH5                                              | dynein, axonemal, heavy polypeptide 5                                 |
| <b>ATPase activity, coupled</b>                    |                                                                       |
| VPS4B                                              | vacuolar protein sorting 4 homolog B ( <i>S. cerevisiae</i> )         |
| <b>Catalytic activity</b>                          |                                                                       |
| EYA2                                               | eyes absent homolog 2 ( <i>Drosophila</i> )                           |
| <b>Cathepsin E activity</b>                        |                                                                       |
| CTSE                                               | cathepsin E                                                           |
| <b>Cobalamin binding/ Cobalt ion binding</b>       |                                                                       |
| MTR                                                | 5-methyltetrahydrofolate-homocysteine methyltransferase               |
| <b>Copper ion binding</b>                          |                                                                       |
| DCT                                                | dopachrome tautomerase (dopachrome delta-isomerase, tyrosine-related) |
| <b>Cysteine-type endopeptidase activity</b>        |                                                                       |
| USP15                                              | ubiquitin specific peptidase 15                                       |
| <b>Damaged DNA binding</b>                         |                                                                       |
| MSH6                                               | mutS homolog 6 ( <i>E. coli</i> )                                     |
| <b>Dihydropteroate synthase activity</b>           |                                                                       |
| MTR                                                | 5-methyltetrahydrofolate-homocysteine methyltransferase               |
| <b>Dipeptidyl-peptidase IV activity</b>            |                                                                       |
| DPP4                                               | dipeptidyl-peptidase 4 (CD26, adenosine deaminase complexing protein) |
| <b>DNA polymerase processivity factor activity</b> |                                                                       |
| PCNA                                               | proliferating cell nuclear antigen                                    |
| <b>Dopachrome isomerase activity</b>               |                                                                       |
| DCT                                                | dopachrome tautomerase (dopachrome delta-isomerase, tyrosine-related) |



## Additional file 1 (continued)

| Gene ID                                                                                          | Gene Name                                                                       |
|--------------------------------------------------------------------------------------------------|---------------------------------------------------------------------------------|
| <b>Ephrin receptor binding</b>                                                                   |                                                                                 |
| EFNB2                                                                                            | ephrin-B2                                                                       |
| <b>G-protein coupled photoreceptor activity</b>                                                  |                                                                                 |
| OPN3                                                                                             | opsin 3 (encephalopsin, panopsin)                                               |
| <b>Growth factor activity</b>                                                                    |                                                                                 |
| HGF                                                                                              | hepatocyte growth factor (hepapoietin A; scatter factor)                        |
| <b>Guanyl nucleotide binding</b>                                                                 |                                                                                 |
| GNAS                                                                                             | GNAS complex locus                                                              |
| <b>Heat shock protein binding</b>                                                                |                                                                                 |
| DNAJA1                                                                                           | DnaJ (Hsp40) homolog, subfamily A, member 1                                     |
| <b>Hematopoietin/interferon-class (D200 domain) cytokine receptor signal transducer activity</b> |                                                                                 |
| STAT1                                                                                            | signal transducer and activator of transcription 1, 91kDa                       |
| <b>Homocysteine S-methyltransferase activity</b>                                                 |                                                                                 |
| MTR                                                                                              | 5-methyltetrahydrofolate-homocysteine methyltransferase                         |
| <b>Hyaluronic acid binding</b>                                                                   |                                                                                 |
| TNFAIP6                                                                                          | tumor necrosis factor, alpha-induced protein 6                                  |
| <b>Janus kinase activity</b>                                                                     |                                                                                 |
| JAK2                                                                                             | Janus kinase 2 (a protein tyrosine kinase)                                      |
| <b>Ligase activity</b>                                                                           |                                                                                 |
| UHRF2                                                                                            | ubiquitin-like, containing PHD and RING finger domains, 2                       |
| <b>Lipid binding</b>                                                                             |                                                                                 |
| ATP5G3                                                                                           | ATP synthase, H <sup>+</sup> transporting, mitochondrial F0 complex, subunit C3 |
| <b>Low-density lipoprotein receptor binding</b>                                                  |                                                                                 |
| DNAJA1                                                                                           | DnaJ (Hsp40) homolog, subfamily A, member 1                                     |
| <b>Manganese ion binding</b>                                                                     |                                                                                 |
| NUDT15                                                                                           | nudix (nucleoside diphosphate linked moiety X)-type motif 15                    |
| <b>Methionine synthase/ Methyltransferase activity</b>                                           |                                                                                 |
| MTR                                                                                              | 5-methyltetrahydrofolate-homocysteine methyltransferase                         |
| <b>Microtubule motor activity</b>                                                                |                                                                                 |
| DNAH5                                                                                            | dynein, axonemal, heavy polypeptide 5                                           |

## Additional file 1 (continued)

| Gene ID                                                            | Gene Name                                                                    |
|--------------------------------------------------------------------|------------------------------------------------------------------------------|
| <b>Motor activity</b>                                              |                                                                              |
| MYO10                                                              | myosin X                                                                     |
| <b>Neutral amino acid transporter activity</b>                     |                                                                              |
| SLC1A4                                                             | solute carrier family 1 (glutamate/neutral amino acid transporter), member 4 |
| <b>Oxidoreductase activity</b>                                     |                                                                              |
| DCT                                                                | dopachrome tautomerase (dopachrome delta-isomerase, tyrosine-related         |
| <b>Pepsin A activity</b>                                           |                                                                              |
| CTSE                                                               | cathepsin E                                                                  |
| <b>Peptidyl-prolyl cis-trans isomerase activity</b>                |                                                                              |
| FKBP1A                                                             | FK506 binding protein 1A, 12kDa                                              |
| <b>Polyribonucleotide nucleotidyltransferase activity</b>          |                                                                              |
| PNPT1                                                              | polyribonucleotide nucleotidyltransferase 1                                  |
| <b>Prolyl oligopeptidase activity</b>                              |                                                                              |
| DPP4                                                               | dipeptidyl-peptidase 4 (CD26, adenosine deaminase complexing protein         |
| <b>Protein kinase activity</b>                                     |                                                                              |
| PAN3                                                               | PAN3 polyA specific ribonuclease subunit homolog (S. cerevisiae)             |
| <b>Protein transporter activity</b>                                |                                                                              |
| XPO1                                                               | exportin 1 (CRM1 homolog, yeast)                                             |
| <b>Protein tyrosine phosphatase activity</b>                       |                                                                              |
| EYA2                                                               | eyes absent homolog 2 (Drosophila)                                           |
| <b>Protein tyrosine sulfotransferase activity</b>                  |                                                                              |
| TPST1                                                              | tyrosylprotein sulfotransferase 1                                            |
| <b>Rhodopsin-like receptor activity</b>                            |                                                                              |
| OPN3                                                               | opsin 3 (encephalopsin, panopsin)                                            |
| <b>Ribosome binding</b>                                            |                                                                              |
| NARG1L                                                             | NMDA receptor regulated 1-like                                               |
| <b>RNA helicase activity</b>                                       |                                                                              |
| DDX6                                                               | DEAD (Asp-Glu-Ala-Asp) box polypeptide 6                                     |
| <b>RNA polymerase III transcription factor activity</b>            |                                                                              |
| GTF3A                                                              | General transcription factor IIIA                                            |
| <b>RNA splicing factor activity, transesterification mechanism</b> |                                                                              |
| TXNL4A                                                             | thioredoxin-like 4A                                                          |

## Additional file 1 (continued)

---

| Gene ID | Gene Name |
|---------|-----------|
|---------|-----------|

---

### RNA-3'-phosphate cyclase activity

|      |                                       |
|------|---------------------------------------|
| RCL1 | RNA terminal phosphate cyclase-like 1 |
|------|---------------------------------------|

### S-adenosylmethionine-dependent methyltransferase activity

|           |                                |
|-----------|--------------------------------|
| LOC196541 | Hypothetical protein LOC196541 |
|-----------|--------------------------------|

### Serine-type endopeptidase inhibitor activity

|        |                                             |
|--------|---------------------------------------------|
| NFE2L2 | nuclear factor (erythroid-derived 2)-like 2 |
|--------|---------------------------------------------|

### SH2 domain binding

|      |                                            |
|------|--------------------------------------------|
| JAK2 | Janus kinase 2 (a protein tyrosine kinase) |
|------|--------------------------------------------|

### Table 3 (continued)

### Sodium:dicarboxylate symporter activity

|        |                                                                              |
|--------|------------------------------------------------------------------------------|
| SLC1A4 | solute carrier family 1 (glutamate/neutral amino acid transporter), member 4 |
|--------|------------------------------------------------------------------------------|

### Solute:cation symporter activity

|          |                                                                     |
|----------|---------------------------------------------------------------------|
| SLC25A12 | solute carrier family 25 (mitochondrial carrier, Aralar), member 12 |
|----------|---------------------------------------------------------------------|

### Structural constituent of eye lens

|       |                     |
|-------|---------------------|
| CRYAB | crystallin, alpha B |
|-------|---------------------|

### Sugar porter activity

|         |                                                                      |
|---------|----------------------------------------------------------------------|
| SLC2A10 | solute carrier family 2 (facilitated glucose transporter), member 10 |
|---------|----------------------------------------------------------------------|

### Symporter activity

|        |                                                                              |
|--------|------------------------------------------------------------------------------|
| SLC1A4 | solute carrier family 1 (glutamate/neutral amino acid transporter), member 4 |
|--------|------------------------------------------------------------------------------|

### Syntaxin-1 binding

|      |             |
|------|-------------|
| SNPH | syntaphilin |
|------|-------------|

### Transcription corepressor activity

|       |                                   |
|-------|-----------------------------------|
| DDIT3 | DNA-damage-inducible transcript 3 |
|-------|-----------------------------------|

### Transcription termination factor activity

|       |                                                |
|-------|------------------------------------------------|
| MTERF | mitochondrial transcription termination factor |
|-------|------------------------------------------------|

### Translation initiation factor activity

|       |                                                 |
|-------|-------------------------------------------------|
| MTIF3 | mitochondrial translational initiation factor 3 |
|-------|-------------------------------------------------|

### Transmembrane receptor activity

|       |           |
|-------|-----------|
| CLDN4 | Claudin 4 |
|-------|-----------|

### Ubiquitin thiolesterase activity

|       |                                 |
|-------|---------------------------------|
| USP15 | ubiquitin specific peptidase 15 |
|-------|---------------------------------|

## Additional file 1 (continued)

| Gene ID                                | Gene Name                                                                                     |
|----------------------------------------|-----------------------------------------------------------------------------------------------|
| <b>Cytokine activity</b>               |                                                                                               |
| CMTM3                                  | CKLF-like MARVEL transmembrane domain containing 3                                            |
| <b>Serine esterase activity</b>        |                                                                                               |
| ACOT12                                 | Acyl-CoA thioesterase 12                                                                      |
| <b>Transmembrane receptor activity</b> |                                                                                               |
| INTS6                                  | integrator complex subunit 6                                                                  |
| <b>Unknown function (33)</b>           |                                                                                               |
| SPAG4L                                 | sperm associated antigen 4-like                                                               |
| BBS5                                   | Bardet-Biedl syndrome 5                                                                       |
| UFM1                                   | ubiquitin-fold modifier 1                                                                     |
| SERINC3                                | serine incorporator 3                                                                         |
| THRAP6                                 | thyroid hormone receptor associated protein 6                                                 |
| PDGFD                                  | platelet derived growth factor D                                                              |
| SCRN3                                  | secernin 3                                                                                    |
| LHX4                                   | LIM homeobox 4                                                                                |
| TRY6                                   | Trypsinogen C                                                                                 |
| DNCL12                                 | DNCL12                                                                                        |
| CIRH1A                                 | cirrhosis, autosomal recessive 1A (cirhin)                                                    |
| SERINC5                                | serine incorporator 5                                                                         |
| DCC1                                   | defective in sister chromatid cohesion homolog 1 ( <i>S. cerevisiae</i> )                     |
| DCL-1                                  | type I transmembrane C-type lectin receptor                                                   |
| KRT71                                  | keratin 71                                                                                    |
| C20orf52                               | chromosome 20 open reading frame 52, nuclear gene encoding mitochondrial protein              |
| DEPDC6                                 | DEP domain containing 6                                                                       |
| DZI                                    | DZI                                                                                           |
| IFT74                                  | intraflagellar transport 74 homolog ( <i>Chlamydomonas</i> )                                  |
| C9orf46                                | chromosome 9 open reading frame 46                                                            |
| GPC5                                   | glypican 5                                                                                    |
| NID                                    | NID                                                                                           |
| C9orf123                               | chromosome 9 open reading frame 123                                                           |
| PCTRK3                                 | PCTRK3                                                                                        |
| PNF2                                   | PNF2                                                                                          |
| FLJ25715                               | hypothetical protein FLJ25715                                                                 |
| CCDC104                                | coiled-coil domain containing 104                                                             |
| MLANA                                  | melan-A                                                                                       |
| C13orf1                                | chromosome 13 open reading frame 1                                                            |
| BMO39                                  | BMO39                                                                                         |
| MTX2                                   | metaxin 2                                                                                     |
| MED10                                  | mediator of RNA polymerase II transcription, subunit 10 homolog (NUT2, <i>S. cerevisiae</i> ) |
| ANKRD32                                | ankyrin repeat domain 32                                                                      |
